# Supplementary material
Source: PubMed Central journal article supplement (PMC7035932)
Supplement: zii999093022s1.pdf [file zii999093022s1.pdf]

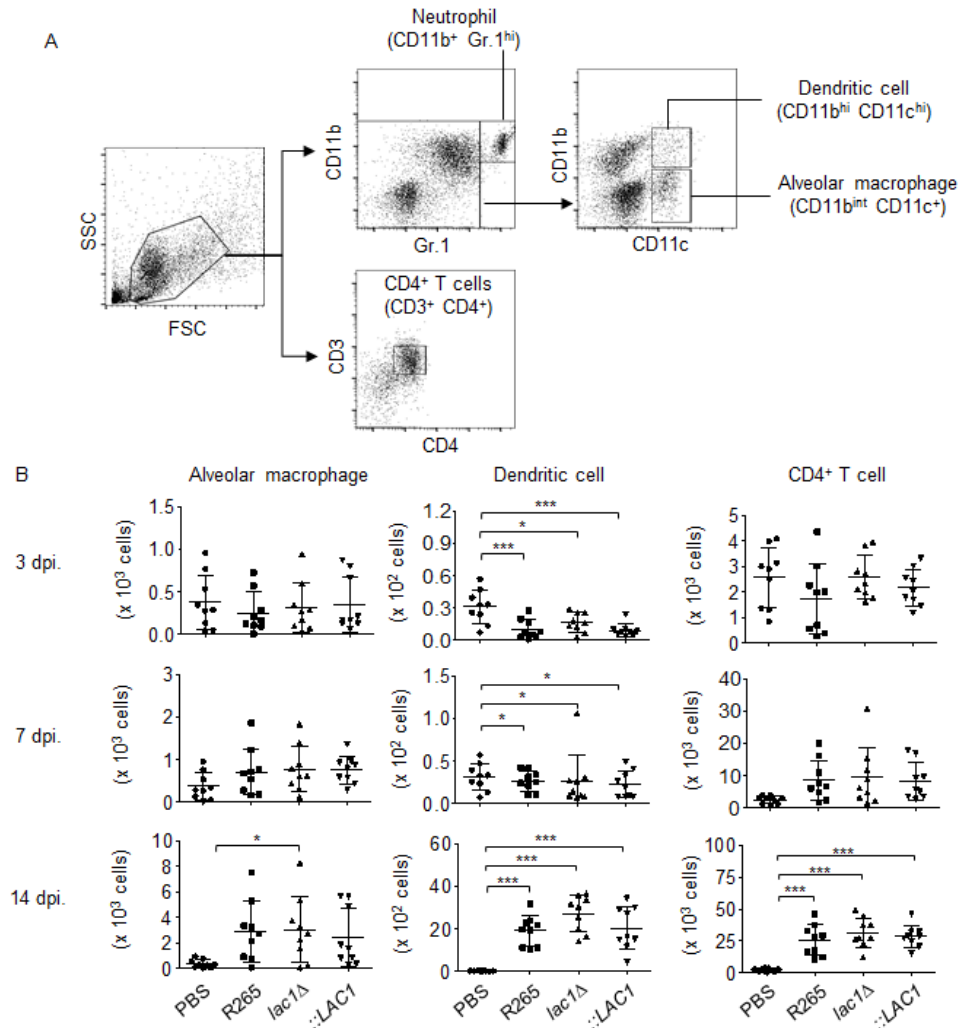

### Supplementary Figure 1: Effect of laccase expression on pulmonary cell infiltration during *C. gattii* infection

BALB/c mice received PBS or were intranasally infected with *C. gattii* R265, *LAC1* deletion strains ( $\Delta lac1$ ) and *LAC1* complementary strains ( $::LAC1$ ) at  $5 \times 10^4$  yeast cells/mouse. At indicated time points, mice were sacrificed and bronchoalveolar lavage (BAL) cells were collected to analyze inflammatory cells by flow cytometry assay. (A) Representative dot plot showed gating strategy for characterization of neutrophil ( $CD11b^+ Gr.1^{hi}$ ), alveolar macrophage ( $CD11b^{int} CD11c^+$ ), dendritic cells ( $CD11b^{hi} CD11c^{hi}$ ), and T helper cells ( $CD3^+ CD4^+$ ). (B) Absolute number of pulmonary alveolar macrophage, dendritic cells and T helper cells at 3, 7 and 14 days post infection. Graphs show individual mice and mean  $\pm$  SD from 3 pooled independent experiments,  $n = 3$  mice per group per experiment. Significance was determined using one-way ANOVA with Tukey's post hoc analysis \*  $p < 0.05$ , \*\*  $p < 0.01$ , \*\*\*  $p < 0.0001$ .
